# Supplementary material for: Comparative Transcriptome Analysis Reveals Genetic Mechanisms of Sugarcane Aphid Resistance in Grain Sorghum
Source: MDPI journal article supplement (doi:10.3390/ijms22137129), 2021-07-01
Supplement: s1 [file s1]

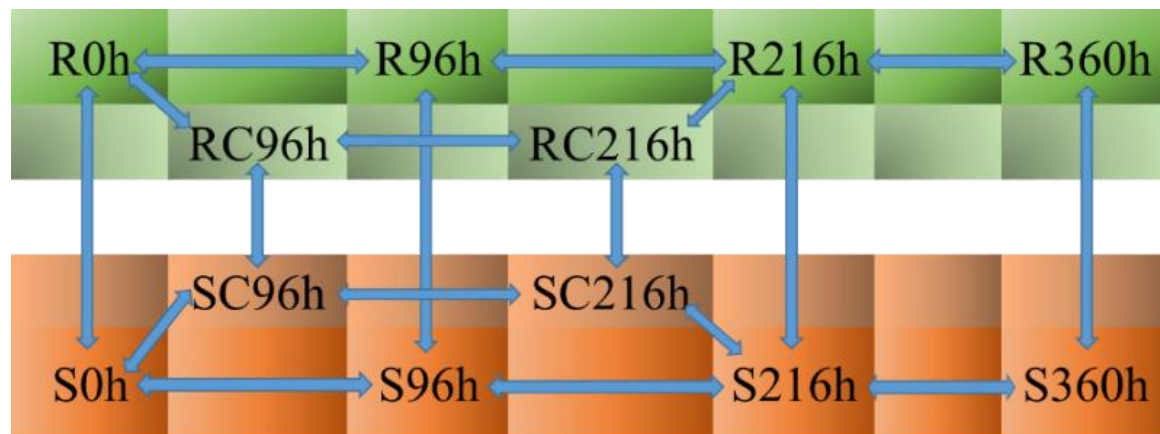

**Figure S1:** Outline of differential expression analysis of resistant and susceptible sorghum genotypes after SCA infestation

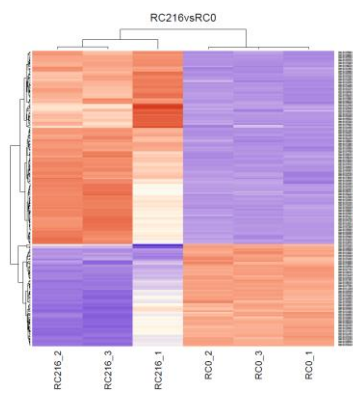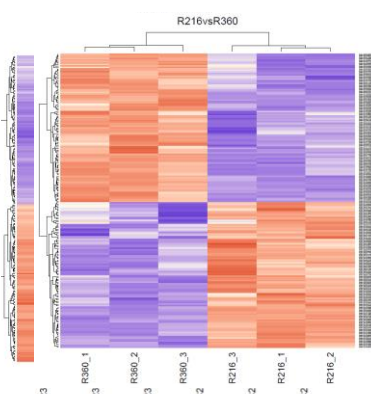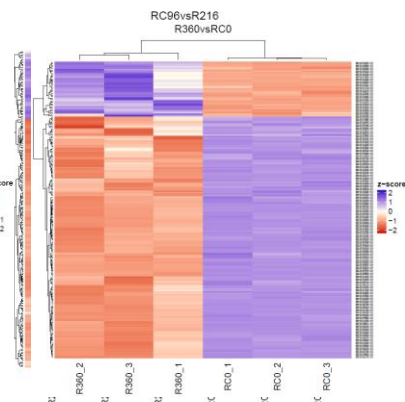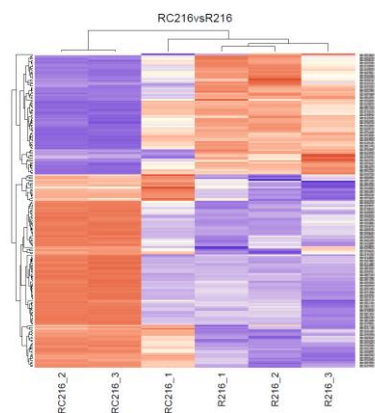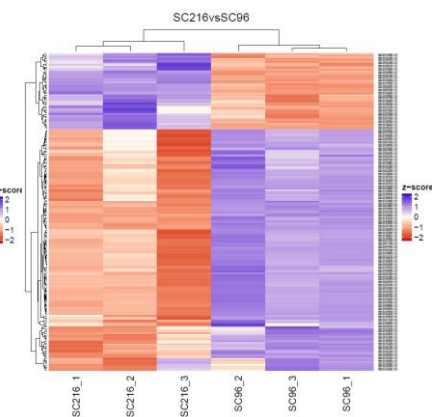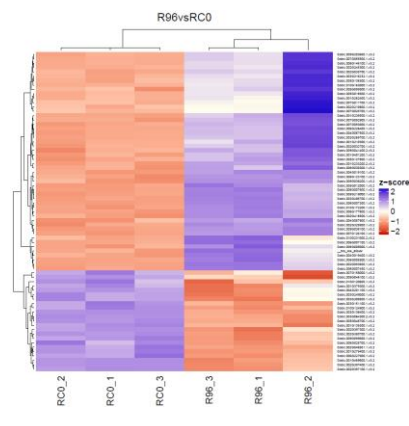

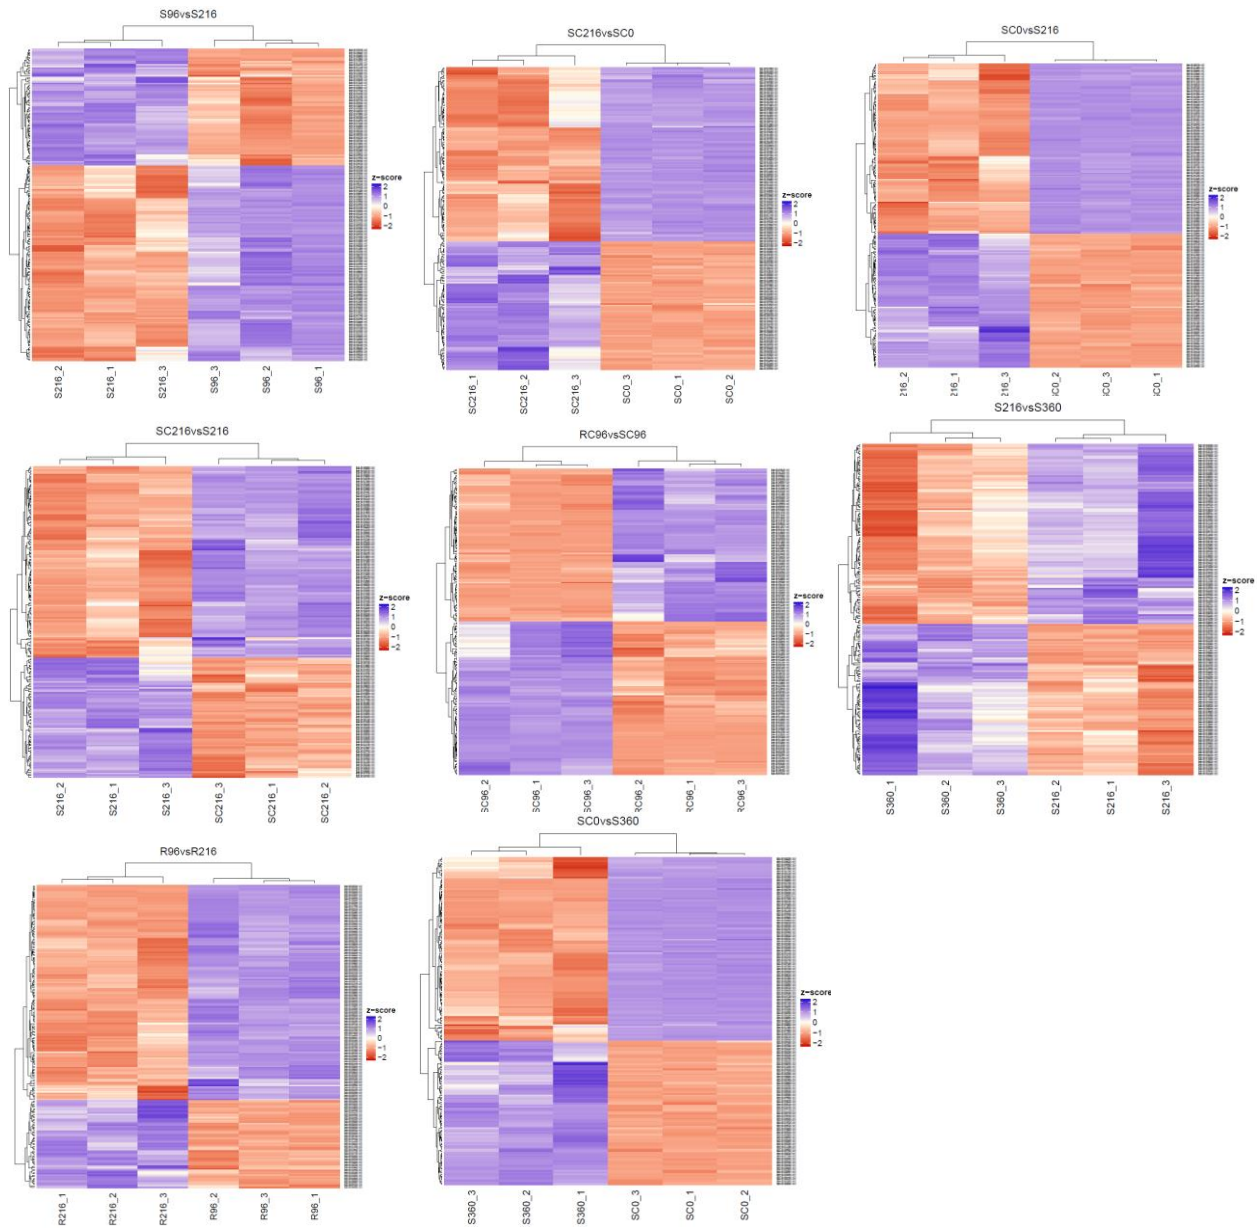

**Figure S2:** Correlograms plots on the final list of differential expressed genes between pairs of samples



**Table S1:** Sequence quality of RNA-Seq reads as checked by trimmomatic at minimum length 36 and % mapped to the reference sorghum genome

| <b>Samples<br/>(3 reps)</b> | <b>Input read<br/>pairs</b> | <b>Both<br/>surviving</b> | <b>Quality<br/>(%)</b> | <b>Forward<br/>only</b> | <b>Reverse<br/>only</b> | <b>Percent<br/>mapping</b> |
|-----------------------------|-----------------------------|---------------------------|------------------------|-------------------------|-------------------------|----------------------------|
| SC0-1                       | 20869532                    | 20020898                  | 95.93                  | 839518                  | 7578                    | 97.87                      |
| SC0-2                       | 21582377                    | 20638744                  | 95.63                  | 935322                  | 6447                    | 97.77                      |
| SC0-3                       | 21495627                    | 20578344                  | 95.73                  | 912765                  | 2632                    | 97.62                      |
| RC0-1                       | 20804391                    | 19921855                  | 95.76                  | 874370                  | 6220                    | 98.16                      |
| RC0-2                       | 23847664                    | 22998304                  | 96.44                  | 834416                  | 13307                   | 98.18                      |
| RC0-3                       | 20450650                    | 19625632                  | 95.97                  | 814978                  | 7943                    | 98.32                      |
| SC96-1                      | 21612368                    | 20593321                  | 95.28                  | 1011415                 | 5405                    | 97.80                      |
| SC96-2                      | 20270518                    | 19402164                  | 95.72                  | 862631                  | 3765                    | 97.69                      |
| SC96-3                      | 22932175                    | 21871434                  | 95.37                  | 1053137                 | 5257                    | 97.79                      |
| RC96-1                      | 20156506                    | 19352416                  | 96.01                  | 799079                  | 2959                    | 97.38                      |
| RC96-2                      | 22339199                    | 21457487                  | 96.05                  | 87660                   | 3148                    | 98.07                      |
| RC96-3                      | 21458947                    | 20481303                  | 95.44                  | 970674                  | 4675                    | 97.71                      |
| S96-1                       | 20375958                    | 19503653                  | 95.72                  | 854093                  | 16458                   | 96.74                      |
| S96-2                       | 20720837                    | 19872620                  | 95.91                  | 870770                  | 5256                    | 97.45                      |
| S96-3                       | 20306856                    | 19424981                  | 95.66                  | 870413                  | 9700                    | 95.71                      |
| R96-1                       | 21729269                    | 20875591                  | 96.07                  | 847675                  | 3777                    | 96.39                      |
| R96-2                       | 22176605                    | 21240941                  | 95.78                  | 924990                  | 8042                    | 97.68                      |
| R96-3                       | 20524704                    | 19710937                  | 96.04                  | 805633                  | 5835                    | 96.33                      |
| SC216-1                     | 21622958                    | 20666100                  | 95.57                  | 950178                  | 4626                    | 97.84                      |
| SC216-2                     | 22273380                    | 21228226                  | 95.31                  | 1037385                 | 5636                    | 97.80                      |
| SC216-3                     | 21223391                    | 20263135                  | 95.48                  | 953705                  | 4778                    | 97.64                      |
| RC216-1                     | 21405058                    | 20387803                  | 95.25                  | 1011524                 | 3734                    | 98.30                      |
| RC216-2                     | 20019075                    | 19182679                  | 95.82                  | 830082                  | 4723                    | 97.61                      |
| RC216-3                     | 21648085                    | 20729431                  | 95.76                  | 913309                  | 3464                    | 97.56                      |
| S216-1                      | 22475053                    | 21456247                  | 95.47                  | 1011431                 | 5410                    | 93.97                      |
| S216-2                      | 21643746                    | 20742298                  | 95.84                  | 894898                  | 4866                    | 96.41                      |
| S216-3                      | 20188220                    | 19374798                  | 95.97                  | 807164                  | 4632                    | 93.38                      |
| R216-1                      | 22142648                    | 21195608                  | 95.72                  | 938673                  | 5681                    | 97.91                      |
| R216-2                      | 20595868                    | 19721048                  | 95.75                  | 860892                  | 12247                   | 97.20                      |
| R216-3                      | 21010044                    | 20126127                  | 95.79                  | 873770                  | 7943                    | 96.89                      |
| S360-1                      | 22415308                    | 21580073                  | 96.27                  | 821684                  | 11779                   | 86.69                      |
| S360-2                      | 21349472                    | 20488840                  | 95.97                  | 852007                  | 6911                    | 92.65                      |
| S360-3                      | 21128786                    | 20201576                  | 95.61                  | 920299                  | 4933                    | 95.35                      |
| R360-1                      | 22330024                    | 21478556                  | 96.19                  | 840828                  | 8492                    | 97.52                      |
| R360-2                      | 21696698                    | 20753367                  | 95.65                  | 936872                  | 4105                    | 97.49                      |
| R360-3                      | 20088692                    | 19071273                  | 94.94                  | 1009906                 | 5461                    | 97.73                      |
| Average                     | 21358630                    | 20450495                  | 96                     | 878726                  | 6328                    | 95.49                      |

**Table S2:** Gene ontology annotation of differentially expressed genes in the R genotype in the course of SCA infestation

|       | GO term    | Ontology * | Description                                                                        | Number in input     | Number in Ref | p-value | FDR     |
|-------|------------|------------|------------------------------------------------------------------------------------|---------------------|---------------|---------|---------|
| R0h   | GO:0015979 | P          | Photosynthesis                                                                     | <a href="#">34</a>  | 91            | 2.1e-23 | 3.2e-21 |
| R0h   | GO:0006091 | P          | Generation of precursor metabolites and energy                                     | <a href="#">16</a>  | 98            | 3e-07   | 2.2e-05 |
| R0h   | GO:0008152 | P          | Metabolic process                                                                  | <a href="#">278</a> | 7395          | 6.7e-06 | 0.00034 |
| R0h   | GO:0009579 | C          | Thylakoid                                                                          | <a href="#">18</a>  | 67            | 5.5e-11 | 4.7e-09 |
| R0h   | GO:0030529 | C          | Intracellular ribonucleoprotein complex                                            | <a href="#">23</a>  | 347           | 0.00085 | 0.024   |
| R0h   | GO:0005840 | C          | Ribosome                                                                           | <a href="#">21</a>  | 295           | 0.0006  | 0.024   |
| S0h   | GO:0003824 | F          | Catalytic activity                                                                 | <a href="#">471</a> | 6982          | 8.8e-08 | 7.2e-06 |
| S0h   | GO:0030246 | F          | Carbohydrate binding                                                               | <a href="#">29</a>  | 189           | 4.8e-06 | 0.00019 |
| S0h   | GO:0016740 | F          | Transferase activity                                                               | <a href="#">202</a> | 2793          | 9.8e-05 | 0.0027  |
| S0h   | GO:0000166 | F          | Nucleotide binding                                                                 | <a href="#">158</a> | 2153          | 0.00037 | 0.0075  |
| S0h   | GO:0016301 | F          | Kinase activity                                                                    | <a href="#">104</a> | 1343          | 0.00083 | 0.013   |
| S0h   | GO:0016772 | F          | Transferase activity, transferring phosphorus-containing groups                    | <a href="#">112</a> | 1533          | 0.0033  | 0.045   |
| R0S0h | GO:0050789 | P          | Regulation of biological process                                                   | <a href="#">46</a>  | 1432          | 0.00043 | 0.021   |
| R0S0h | GO:0019725 | P          | Cellular homeostasis                                                               | <a href="#">10</a>  | 132           | 0.00035 | 0.021   |
| R0S0h | GO:0050794 | P          | Regulation of cellular process                                                     | <a href="#">46</a>  | 1401          | 0.00027 | 0.021   |
| R0S0h | GO:0042592 | P          | Homeostatic process                                                                | <a href="#">10</a>  | 143           | 0.00063 | 0.023   |
| R0S0h | GO:0065007 | P          | Biological regulation                                                              | <a href="#">46</a>  | 1487          | 0.00094 | 0.027   |
| R0S0h | GO:0005576 | C          | Extracellular region                                                               | <a href="#">7</a>   | 66            | 0.00043 | 0.023   |
| RS96h | GO:0007049 | P          | Cell cycle                                                                         | <a href="#">8</a>   | 100           | 1.8e-06 | 0.0002  |
| RS96h | GO:0006259 | P          | DNA metabolic process                                                              | <a href="#">10</a>  | 223           | 1.3e-05 | 0.00072 |
| RS96h | GO:0003774 | F          | Motor activity                                                                     | <a href="#">11</a>  | 69            | 2.4e-11 | 1.2e-09 |
| RS96h | GO:0003677 | F          | DNA binding                                                                        | <a href="#">29</a>  | 1112          | 7.6e-09 | 1.9e-07 |
| RS96h | GO:0017111 | F          | Nucleoside-triphosphatase activity                                                 | <a href="#">16</a>  | 394           | 1e-07   | 1.7e-06 |
| RS96h | GO:0016462 | F          | Pyrophosphatase activity                                                           | <a href="#">16</a>  | 409           | 1.7e-07 | 2.1e-06 |
| RS96h | GO:0016818 | F          | Hydrolase activity, acting on acid anhydrides, in phosphorus-containing anhydrides | <a href="#">16</a>  | 418           | 2.3e-07 | 2.2e-06 |
| RS96h | GO:0016817 | F          | Hydrolase activity, acting on acid anhydrides                                      | <a href="#">16</a>  | 428           | 3.1e-07 | 2.5e-06 |
| RS96h | GO:0003676 | F          | Nucleic acid binding                                                               | <a href="#">31</a>  | 1968          | 9e-05   | 0.00064 |
| RS96h | GO:0016787 | F          | Hydrolase activity                                                                 | <a href="#">29</a>  | 2042          | 0.0009  | 0.0056  |
| RS96h | GO:0000166 | F          | Nucleotide binding                                                                 | <a href="#">28</a>  | 2153          | 0.0041  | 0.023   |
| RS96h | GO:0044446 | C          | Intracellular organelle part                                                       | <a href="#">26</a>  | 513           | 4.4e-14 | 1.3e-12 |
| RS96h | GO:0044422 | C          | Organelle part                                                                     | <a href="#">26</a>  | 515           | 4.8e-14 | 1.3e-12 |
| RS96h | GO:0043232 | C          | Intracellular non-membrane-bounded organelle                                       | <a href="#">26</a>  | 538           | 1.3e-13 | 1.7e-12 |

|          |            |   |                                                                 |                    |      |         |         |
|----------|------------|---|-----------------------------------------------------------------|--------------------|------|---------|---------|
| RS96h    | GO:0043228 | C | Non-membrane-bounded organelle                                  | <a href="#">26</a> | 538  | 1.3e-13 | 1.7e-12 |
| RS96h    | GO:0043226 | C | Organelle                                                       | <a href="#">39</a> | 1423 | 1.7e-12 | 1.5e-11 |
| RS96h    | GO:0043229 | C | Intracellular organelle                                         | <a href="#">39</a> | 1421 | 1.6e-12 | 1.5e-11 |
| RS96h    | GO:0005856 | C | Cytoskeleton                                                    | <a href="#">13</a> | 135  | 1.1e-10 | 8.8e-10 |
| RS96h    | GO:0044424 | C | Intracellular part                                              | <a href="#">40</a> | 1815 | 5.8e-10 | 3.5e-09 |
| RS96h    | GO:0005622 | C | Intracellular                                                   | <a href="#">41</a> | 1895 | 5.6e-10 | 3.5e-09 |
| RS96h    | GO:0005623 | C | Cell                                                            | <a href="#">42</a> | 1999 | 7.6e-10 | 3.7e-09 |
| RS96h    | GO:0044464 | C | Cell part                                                       | <a href="#">42</a> | 1999 | 7.6e-10 | 3.7e-09 |
| RS96h    | GO:0032991 | C | Macromolecular complex                                          | <a href="#">28</a> | 989  | 2.5e-09 | 1.1e-08 |
| RS96h    | GO:0005634 | C | Nucleus                                                         | <a href="#">15</a> | 669  | 0.00025 | 0.001   |
| R96-S96h | GO:0043227 | C | Membrane-bounded organelle                                      | <a href="#">15</a> | 936  | 0.0065  | 0.023   |
| R96-S96h | GO:0043231 | C | Intracellular membrane-bounded organelle                        | 15                 | 936  | 0.0065  | 0.023   |
| S96h     | GO:0006950 | P | Response to stress                                              | 58                 | 483  | 6.9e-08 | 1.6e-05 |
| S96h     | GO:0050896 | P | Response to stimulus                                            | 80                 | 872  | 6.7e-06 | 0.00079 |
| S96h     | GO:0032501 | P | Multicellular organismal process                                | 22                 | 179  | 0.00063 | 0.049   |
| S96h     | GO:0003824 | F | Catalytic activity                                              | 443                | 6982 | 3.2e-06 | 0.00026 |
| S96h     | GO:0004518 | F | Nuclease activity                                               | 15                 | 97   | 0.00057 | 0.023   |
| S96h     | GO:0005576 | C | Extracellular region                                            | 12                 | 66   | 0.00056 | 0.043   |
| R216h    | GO:0008152 | P | Metabolic process                                               | 463                | 7395 | 7.2e-05 | 0.0083  |
| R216h    | GO:0009607 | P | Response to biotic stimulus                                     | 8                  | 20   | 6.3e-05 | 0.0083  |
| R216h    | GO:0006950 | P | Response to stress                                              | 47                 | 483  | 0.00025 | 0.016   |
| R216h    | GO:0051704 | P | Multi-organism process                                          | 15                 | 88   | 0.00027 | 0.016   |
| R216h    | GO:0003824 | F | Catalytic activity                                              | 456                | 6982 | 6e-07   | 4.6e-05 |
| R216h    | GO:0030246 | F | Carbohydrate binding                                            | 24                 | 189  | 0.00031 | 0.012   |
| S216h    | GO:0003824 | F | Catalytic activity                                              | 161                | 6982 | 1.4e-06 | 8.7e-05 |
| R360h    | GO:0006464 | P | Cellular protein modification process                           | 128                | 1589 | 2.1e-05 | 0.0043  |
| R360h    | GO:0008152 | P | Metabolic process                                               | 466                | 7395 | 8.5e-05 | 0.0057  |
| R360h    | GO:0043412 | P | Macromolecule modification                                      | 128                | 1629 | 6.1e-05 | 0.0057  |
| R360h    | GO:0009607 | P | Response to biotic stimulus                                     | 7                  | 20   | 0.00037 | 0.019   |
| R360h    | GO:0003824 | F | Catalytic activity                                              | 459                | 6982 | 7.1e-07 | 6.8e-05 |
| R360h    | GO:0016301 | F | Kinase activity                                                 | 116                | 1343 | 2.9e-06 | 0.00014 |
| R360h    | GO:0016740 | F | Transferase activity                                            | 205                | 2793 | 1.6e-05 | 0.00049 |
| R360h    | GO:0030246 | F | Carbohydrate binding                                            | 26                 | 189  | 6.2e-05 | 0.0015  |
| R360h    | GO:0016772 | F | Transferase activity, transferring phosphorus-containing groups | 121                | 1533 | 8.4e-05 | 0.0016  |
| S360h    | GO:0003824 | F | catalytic activity                                              | 458                | 6982 | 0.00019 | 0.017   |
| S360h    | GO:0043232 | C | intracellular non-membrane-bounded organelle                    | 52                 | 538  | 0.00044 | 0.026   |
| S360h    | GO:0043228 | C | non-membrane-bounded organelle                                  | 52                 | 538  | 0.00044 | 0.026   |

\*C=Cellular components, F=Molecular function, and P=biological process
